# Supplementary material for: Impact of prior specifications in ashrinkage-inducing Bayesian model for quantitative trait mapping and genomic prediction
Source: PubMed Central journal article supplement (PMC3750442; doi:10.1186/1297-9686-45-24), 2013-07-08
Supplement: 1297-9686-45-24-S3.pdf [file 1297-9686-45-24-S3.pdf]

## The C implementation of the generalized expectation-maximization algorithm (GEM)

We used the C model below under a Windows operating system. In this case, the C code below has to be compiled first into a dynamic link library with .dll extension (see R documentation for details). This dll is then be loaded by R with the command:

```
> dyn.load("gem.dll")
```

An example call in R is

```
> RESULT <- .Call("gem", y, X, M, N, alpha, beta, sigma2,
                  borders, pp, c, shape, rate, prec)
```

Here, the arguments  $y, \dots, prec$  refer to appropriate R objects. The result is stored in a list object *RESULT*.

```
#include <R.h>
#include <Rinternals.h>
#include <Rmath.h>
#include <math.h>

void alphaupdate(double *,double *, double , int , double );
void varupdate(double *, double *, int ,double,double );
void betaupdate(double *, double *, double *, double , double *,
               double , double , double , int , int );

SEXP gem(SEXP yIN,          /* phenotypes */
         SEXP xmatIN,     /* genotype matrix */
         SEXP MIN,        /* number of SNPs */
         SEXP NIN,        /* number of individuals */

         SEXP alphaIN,    /* initial values */
         SEXP betaIN,
         SEXP sigma2IN,

         SEXP bordersIN, /* parameters (-l, -b, b, l) in MU */
         SEXP ppIN,      /* vector ( (1-p0)/2, p0, (1-p0)/2 ) */
         SEXP cIN,       /* prior variance of alpha */
         SEXP shapeIN,   /* prior shape for variance component */
         SEXP rateIN,    /* prior rate for variance component */

         SEXP precIN /* precision parameter for convergence check */
        )
{
SEXP ans, alphaAns, sigma2Ans,
     betaAns, countAns, resAns, gevAns;

double alphaCur=REAL(alphaIN)[0], oldalpha,
       sigma2Cur=REAL(sigma2IN)[0], oldsigma2,
       *betaCur, *oldbeta,
       *resids,
       pardiff, count, test;

int N = INTEGER(NIN)[0],
    M = INTEGER(MIN)[0],
    m, n;
```

```

double c = REAL(cIN)[0],
      shape = REAL(shapeIN)[0],
      rate = REAL(rateIN)[0],
      qnull = REAL(ppIN)[1]/(REAL(bordersIN)[2]-REAL(bordersIN)[1]),
      qminus = REAL(ppIN)[0]/(REAL(bordersIN)[1]-REAL(bordersIN)[0]),
      qplus = REAL(ppIN)[2]/(REAL(bordersIN)[3]-REAL(bordersIN)[2]),
      convprec = REAL(precIN)[0];

betaCur = (double *)      calloc(M, sizeof(double));
oldbeta = (double *)      calloc(M, sizeof(double));

for ( m = 0; m < M; m++) {
    betaCur[m]=REAL(betaIN)[m];
}
resids = (double *) calloc(N, sizeof(double));

for (n=0; n < N ; n++){
    resids[n]=REAL(yIN)[n] - alphaCur;
    for (m = 0; m < M; m++)
        resids[n] -= betaCur[m]*REAL(xmatIN)[n+m*N];
}
PROTECT( alphaAns = allocVector(REALSXP, 1));
PROTECT( sigma2Ans = allocVector(REALSXP, 1));
PROTECT( betaAns = allocVector(REALSXP, M));
PROTECT( countAns = allocVector(REALSXP, 1));
PROTECT( resAns = allocVector(REALSXP, N));
PROTECT( gevAns = allocVector(REALSXP, N));

GetRNGstate();

test = 1.0;
count = 0.0;

while (test>0.0 && count < 1000.0){

    test = 0.0;
    pardiff = 0.0;

    oldalpha = alphaCur;
    alphaupdate(&alphaCur, resids, c, N, sigma2Cur);
    pardiff += fabs(oldalpha - alphaCur);

    oldsigma2 = sigma2Cur;
    varupdate(&sigma2Cur, resids, N, shape, rate);
    pardiff += fabs(oldsigma2 - sigma2Cur);

    for (m = 0; m < M; m++) oldbeta[m] = betaCur[m];
    betaupdate(betaCur, resids, REAL(xmatIN), sigma2Cur, REAL(bordersIN),
              qminus, qnull, qplus, M, N);
    for (m = 0; m < M; m++) pardiff += fabs(oldbeta[m]-betaCur[m]);

    if( pardiff >= ( M + 2)*convprec) test +=1.0;
    count += 1.0;

}

for (m = 0; m < M; m++) REAL(betaAns)[m] = betaCur[m];
for (n = 0; n < N; n++) {
    REAL(resAns)[n] = resids[n];
    REAL(gevAns)[n] = REAL(yIN)[n] - resids[n] - alphaCur;
}

```

```

REAL(alphaAns)[0] = alphaCur;
REAL(sigma2Ans)[0] = sigma2Cur;
REAL(countAns)[0] = count;

PutRNGstate();
PROTECT(ans = allocVector(VECSXP,6));
SET_VECTOR_ELT(ans, 0, betaAns);
SET_VECTOR_ELT(ans, 1, alphaAns);
SET_VECTOR_ELT(ans, 2, sigma2Ans);
SET_VECTOR_ELT(ans, 3, countAns);
SET_VECTOR_ELT(ans, 4, resAns);
SET_VECTOR_ELT(ans, 5, gevAns);

free(betaCur);
free(oldbeta);
free(resids);
UNPROTECT(7);
return(ans);
}

void betauupdate(double *beta, double *res, double *x,
                double s2,
                double *borders,
                double qminus, double qnull, double qplus,
                int M, int N
                )
{
    int m, n;
    double mu, sd, p1, p2, p3, p4, q1, q2, q3, q4,
           cminus, cnull, cplus, D,
           meannull, meanminus, meanplus;

    for (m = 0; m < M; m++){
        mu=0.0;
        sd=0.0;
        for (n = 0; n < N; n++){
            res[n] += x[n+m*N]*beta[m];
            mu += x[n+m*N]*res[n];
            sd += x[n+m*N]*x[n+m*N];
        }
        mu = mu/sd;
        sd = sqrt(s2/sd);
        p1 = pnorm(borders[0], mu, sd, 1, 0);
        p2 = pnorm(borders[1], mu, sd, 1, 0);
        p3 = pnorm(borders[2], mu, sd, 1, 0);
        p4 = pnorm(borders[3], mu, sd, 1, 0);
        cminus = qminus*(p2-p1);
        cnull = qnull*(p3-p2);
        cplus = qplus*(p4-p3);
        D = cminus + cnull + cplus;
        cminus = cminus/D;
        cnull = cnull/D;
        cplus = cplus/D;

        q1 = dnorm( (borders[0]-mu)/sd, 0.0, 1.0, 0);
        q2 = dnorm( (borders[1]-mu)/sd, 0.0, 1.0, 0);
        q3 = dnorm( (borders[2]-mu)/sd, 0.0, 1.0, 0);
        q4 = dnorm( (borders[3]-mu)/sd, 0.0, 1.0, 0);
        meanminus=0.0;
        meannull=0.0;
        meanplus=0.0;
        if (p2 - p1 > 0) meanminus = mu + sd*( q1 - q2 )/(p2 - p1);
        if (p3 - p2 > 0) meannull = mu + sd*( q2 - q3 )/(p3 - p2);
    }
}

```

```

        if (p4 - p3 > 0)    meanplus = mu  + sd*( q3 - q4 )/(p4 - p3);

        beta[m] = cminus*meanminus + cnull*meannull + cplus*meanplus;

        for (n = 0; n < N; n++)
            res[n] -= x[n+m*N]*beta[m];
    }
}

void varupdate(double *sigma2,
              double *eff,
              int Neff,
              double s,
              double r){
    int i;
    double rate, shape;
    rate = 0;
    for (i = 0; i < Neff; i++)
        rate += eff[i]*eff[i];
    rate = r + 0.5*rate;
    shape = s + Neff/2.0;
    *sigma2 = rate/(shape-1.0);
}

void alphaupdate(double *alpha,
                double *resids,
                double c,
                int N,
                double sigma2){
    int n;
    double meana, vara;
    meana=0.0;
    /* remove effect of alphaCur from the residuals*/
    for (n=0; n<N; n++){
        resids[n] += *alpha;
        meana += resids[n];
    }
    vara = c * sigma2/(N*c+ sigma2 );
    meana = vara * meana / sigma2;
    /* update alpha */
    *alpha = meana;
    /* add effect of alpha to residuals */
    for (n=0; n<N; n++)
        resids[n] -= *alpha;
}

```
